# Supplementary material for: The effects of sex and gender attributes on clinical outcomes: A systematic review
Source: Research Square preprint supplement (doi:10.21203/rs.3.rs-7077506/v1), 2025-07-23
Supplement: Supplementary file 4 [file 80531a74c504cf1686fc5ca6.docx]

Table 1. Summary of all included studies investigating effect of sex or gender attributes on clinical outcomes

| Author (year);  Journal;  Country; Region;  City; Location of research; Study Quality (Fair, Good, Excellent) | 1. Objective 2. Design 3. Follow up/assessment times, if any 4. Inclusion criteria    1. Social    2. Clinical    3. Behavioural    4. Other 5. Exclusion criteria    1. Social    2. Clinical    3. Behavioural    4. Other | 1. Total sample size, n (M/F) 2. Attrition, % (if multiple assessments) 3. Age (mean ± SD) or range 4. Sex, %M 5. Other parameters reported 6. Parameters considered in analysis 7. Primary predictor(s)* 8. Other | 1. Measure of sex and/or gender 2. Measure of outcome(s) 3. Statistical analysis/analysis controls for | 1. Sex- and/or gender- related results 2. Other parameters related to outcome(s) 3. Researcher notes |
| --- | --- | --- | --- | --- |
| 1. Arcand M, et al. (2023); *Front Psychol*; Canada; Quebec; Montreal; Community; Fair | 1. Examine effects of sex & GR on stress, depr, anx during COVID-19 2. Longitudinal 3. F/u at 3mos (t1), 6mos (t2), 9mos (t3), 12mos (t4) 4. a. NR 5. No meds for mental illness 6. NR 7. NR 8. a. NR 9. NR 10. NR 11. Incomplete gender role questionnaire | 1. 153 (50M/103F) 2. t1=2.0%; t2=7.2%; t3=13.7%; t4=9.8% 3. M (37.65) F (32.21) 4. 33% M 5. NR 6. a. Masc/fem; binary sex   b. Place of residence, occupation, education | 1. Binary sex (M, F); BSRI-SF 2. DASS-21 3. Linear mixed effects models / binary sex, time(t1-t4); *post hoc* contrast comparisons / binary sex, time (t1-t4) | 1. No sex/gender effects on depr; F w/ high fem had **↑** stress than M w/ high fem at t1;F w/ low fem had **↑** anx than M w/ low fem at t4 2. No effect on stress, depr, anx Sx 3. F had more Sx of stress & anx than M; no assoc b/w masc traits & stress, anx, or depr |
| 1. Boeri L, et al. (2017); *J Sex Med;* Italy; Milan; Academic hospital; Good | 1. Examine impact of low cFT/low TT on androgen-related Sx 2. Cross-sectional 3. NA 4. a. Male, heterosexual, sexually active, European Caucasian 5. ED as primary complaint 6. NR 7. NR 8. a. NR 9. Hx of radical prostatectomy, radical cystectomy, pelvic radiation therapy, androgen deprivation, TD/T therapy 10. NR 11. NR | 1. 500 (500M/0F) 2. NA 3. 18-70 4. 100% M 5. Race (100% European Caucasian), age, BMI, waist circumference, CCI score, smoking, hypertension, MetS 6. a. TT & cFT levels b. Age, BMI, CCI score | 1. Normal, low cFT; normal, low TT 2. IIEF; BDI 3. One-way ANOVA; Pearson χ2 test; univariable, multivariable linear regression analyses / age, BMI, CCI score | 1. TTnorm+cFTlow, TTlow+cFTlow had **↓** IIEF-EF, IIEF-SD, IIEF-OF, **↑** BDI 2. Age inversely assoc w/ IIEF-EF, IIEF-SD, IIEF-OF 3. Low cFT values indep predicted IIEF-EF, IIEF-SD, IIEF-OF, BDI, irrespective of TT level |
| 1. Cunningham ML, et al. (2020); *Body Image*; Australia; New South Wales; Sydney; Community; Good | 1. Examine indirect pathway linking masc discrepancy stress to MD Sx via emotion dysreg 2. Cross-sectional 3. NA 4. a. Male 5. NR 6. NR 7. NR 8. a. NR 9. NR 10. NR 11. NR | 1. 391 (391M/0F) 2. NA 3. 18-50 (22.06 ± 5.34) 4. 100% M 5. Region of birth (48.3% Australia, 18.4% North America, 17.4% Asia), language (71.7% English, 13.4% Chinese), sexual orientation 6. a. Masc discrepancy stress b. NR | 1. MGRDSS 2. MDDI, DERS 3. Descriptive statistics; Pearson zero-order correlations / NR | 1. Masc discrepancy stress had sig pos assoc w/ MD; Sig indirect pathway from masc discrepancy stress to MD Sx via emotion dysreg 2. NA 3. Lack of emotion reg strategies is potential pathway b/w masc discrepancy stress & MD Sx |
| 1. Dumesic DA, et al. (2019); *J Clin Endocrinol Metab*; USA; California; Los Angeles; Academic hospital; Good | 1. Examine relationship b/w TT & adipose-IR in F w/PCOS & controls 2. Prospective cohort 3. NA 4. a. Female, non-Hispanic white    1. Dx of PCOS    2. NR    3. NR 5. a. NR 6. Congenital adrenal hyperplasia, thyroid dysfunction, hyperprolactinemia 7. NR 8. NR | 1. 28 (0M/28F) 2. NA 3. 19-35 4. 0% M 5. Race (100% non-Hispanic white) 6. a. TT & free T b. NR | 1. Continuous TT (ng/dL) & free T (pg/mL) 2. Calculated adipose-IR 3. Pearson correlation coefficient / age, obesity | 1. TT & free T levels has pos assoc w/ adipose-IR in control+PCOS 2. NA 3. Pos assoc of adipose-IR w/ androgen levels suggests *in vivo* effect of androgens on adipocyte function |
| 1. Gibson PA, et al. (2016); *J Affect Disord*; USA; Community; Good | 1. Investigate relationship b/w sex, gender, education on depr in young adults 2. Cross-sectional 3. NA 4. a. NR    1. NR    2. In current heterosexual relationship    3. Data from National Longitudinal Survey of Adolescent Health Wave III 5. a. NR    1. NR    2. NR    3. NR | 1. 4302 (1742M/2460F) 2. NA 3. 18-26   M (22.28 ± 1.68)  F (21.95 ± 1.74)   1. 40% M 2. Education, race, family status in adolescence, parental education 3. a. Masc/fem; binary sex b. Education | 1. BSRI 2. CES-D 3. Negative binomial regression / Race, age, family status in adolescence, parental education, adolescent alcohol use | 1. Fem in F & M was negatively assoc w/ depr; M w/ high masc had ↓ depr Sx; F w/ high masc showed NS assoc w/ depr 2. F w/ high masc, non-college educated had ↑ depr Sx; college-educated had ↓ depr Sx; M w/ high fem, college-educated had ↓ depr Sx; Other assoc NS 3. In M & F, fem supported ↓ depr Sx compared to masc |
| 1. Helgeson VS. (1991); *Psychosom Med;* USA; Colorado/New York; Denver/Long Island; Hospital; Fair | 1. Investigate relationship b/w masc & social support w/ recovery from MI 2. Longitudinal 3. Follow up at 3mos, 6mos, 12mos 4. a. age ≤ 70    1. Dx of acute MI    2. NR 5. a. NR    1. NR    2. NR    3. NR | 1. 90 (70M/20F) 2. 12mos=3% 3. 37-70 4. 78% M 5. Education, religion, occupation, SES 6. a. Masc  b. Age, SES | 1. PAQ 2. Self-report: chest pain, health perception 3. Stepwise logistic regression analysis, stepwise multiple regression analysis / sex, Peel index, psychological distress, CHD risk factors | 1. Masc did not sig predict perceived health; masc was sig predictor of post-MI chest pain 2. No sig assoc b/w sex/age/SES & recovery 3. Spouse disclosure was most sig indep predictor of chest pain, health perception |
| 1. Hunt K, et al. (2006); *Soc Psychiatry Psychiatr Epidemiol;* United Kingdom; Scotland; Glasgow; Community; Good | 1. Investigate relationship b/w gender & SI in three generational cohorts (1930, 1950, 1970) 2. Longitudinal 3. t0:1987-8, t1:1990-1, t2:1995-6, t3:2000-2 4. a. NR    1. NR    2. NR    3. Data from West of Scotland Twenty-07 Study, all cohorts 5. a. NR    1. NR    2. NR    3. NR | 1. 2125 (960M/1160F) 2. NR 3. Age-based cohorts at t0: 15, 35, 55 4. 45% M 5. NR 6. a. Masc/fem; binary sex b. NR | 1. BSRI-SF 2. SI 3. Logistic regression models / NR | 1. In M & F, masc was assoc w/ SI in 1930/1950 cohorts; fem was not assoc w/ SI in any age cohorts in M or F 2. NA 3. In early, late middle age, M & F w/ high masc report ↑ SI; no relationship b/w fem & SI in M or F at any age |
| 1. Hunt K, et al. (2007); *Int J Epidemiol*; United Kingdom; Scotland; Glasgow; Community; Good | 1. Investigate relationship b/w GRO & CHD mortality 2. Prospective cohort 3. NA 4. a. NR    1. NR    2. NR    3. Data from West of Scotland Twenty-07 Study, oldest cohort 5. a. NR    1. NR    2. NR    3. NR | 1. 1551 (704M/847F) 2. NA 3. 55 4. 45% M 5. SES 6. a. Masc/fem; binary sex b. SES | 1. BSRI 2. Death from CHD 3. Univariate statistics, Cox regression models / smoking, binge drinking, BMI, systolic BP, income, psychological well-being | 1. In M w/ high fem, ↓ risk of CHD mortality; in F w/ high fem & in M & F w/ high masc, NS relationship w/ CHD mortality 2. NS change in assoc when adjusted for SES 3. Relationship b/w ↓ fem & ↑ CHD mortality in M, not F; NS assoc b/w masc & CHD mortality in M & F |
| 1. Iwamoto D, et al. (2018); *Am J Mens Health;* USA; Maryland; College Park; Community; Good | 1. Examine relationship b/w masc norm conformity & depr Sx in young men 2. Longitudinal 3. Follow-up at 6mos 4. a. Male, 18-20yrs 5. NR 6. College freshman 7. NR 8. a. NR 9. NR 10. NR 11. NR | 1. 322 (322M/0F) 2. NR 3. 18-20 (18 ± 0.38) 4. 100% M 5. Race, education 6. a. Masc b. NR | 1. CMNI-29 2. BDI-II 3. Negative binomial regression model / NR | 1. Adherence to playboy, self-reliance, violence norms had pos assoc w/ depr; adherence to winning & power over women norms had neg assoc w/ depr 2. NA 3. Sig relationship b/w depr severity & distinct masc norms in young men |
| 1. Kerr P, et al. (2021); *J Psychosom Res;* Canada; Quebec; Montreal; Community; Good | 1. Measure effect of gender roles on MH & workplace stress in psychiatric hospital workers 2. Exploratory retrospective 3. NA 4. a. NR 5. NR 6. Employed at psychiatric hospital 7. NR 8. a. NR 9. NR 10. NR 11. NR | 1. 192 (55M/137F) 2. NA 3. 18-72 (40.5) 4. 29% M 5. Occupation, education, social capital 6. a. Masc/fem b. Occupation, age | 1. BSRI-SF 2. BDI-II, PTSD-CC 3. Structural equation model (path analysis) / other job strain factors | 1. Masc & fem had neg assoc w/ depr; Masc had neg assoc w/ trauma sx 2. Age assoc w/ ↓ depressive Sx & social support; pos assoc b/w occupation & psychological demands 3. Gender role endorsement assoc w/ psychosocial outcomes |
| 1. Leinonen JT, et al. (2023); *Commun med;* Finland; Community; Good | 1. Examine role of T in metabolic conditions & sex-specific Dx in both M & F 2. Cross-sectional 3. NA 4. a. NR 5. NR 6. NR 7. Data from UK Biobank (white British subset) & FinnGen registry 8. a. NR 9. NR 10. NR 11. NR | 1. 625,650 2. NA 3. 24-73 4. NR 5. NR 6. a. TT & free T, binary sex b. NR | 1. TT (nmol/L), free T (nmol/L) 2. Diseases w/ links to hormones 3. PGS & MR Egger analyses / SHBG, BMI, PCOS, menopause, genetic pleiotropy | 1. In M, ↑ free T has causal relationship w/ prostate cancer, ↓ osteoporosis; in F, ↑ free T has causal relationship w/ hirsutism, PCOS, PMB, breast cancer, ↑ TT has causal relationship w/ hirsutism, PMB, breast cancer 2. In F, T levels may have ↑ effect on disease risk, inc PCOS 3. The relationship b/w T levels & metabolic & endocrine traits is highly complex |
| 1. Möller-Leimkühler A, et al. (2009**)**;  *J Affect Disorders;*  Germany; Munich; School; Good | 1. To assess relationship b/w M depr in university students w/ sex, GRO, personality traits 2. Cross-sectional 3. NA 4. a. University students    1. NR    2. NR    3. Recruited from different faculties at the Ludwig-Maximilians-University of Munich 5. a. NR    1. NR    2. NR    3. NR | 1. 1018 (518M/500F) 2. NA 3. M (24.51) F (23.66) 4. 51% M 5. Age, education 6. a. Masc/fem; binary sex   b. NR | 1. GE-PAQ 2. WHO-5, GSMD 3. Pearson Correlation analysis /NR; Multivariate ANOVA / binary sex, GRO; Principal Component Analysis/NR | 1. Risk of M depr was sig ↑ in F, not M 2. Binary sex, GRO had indep effects on risk of M depr w/o interacting effects 3. Risk of M depr ↓ in F w/ ↑ masc, but ↑ in F w/ ↓ masc |
| 1. Nguefack H, et al. (2022); *Frontier Pain Res*; Canada; Quebec; Montreal; Community; Excellent | 1. Explore the assoc b/w GI & GR & their interactions w/ participants w/ CP 2. Retrospective 3. NA 4. a. Aged 18-88yrs    1. NR    2. NR    3. Participants from COPE cohort in Quebec, Canada 5. a. NR    1. NR    2. NR    3. NR | 1. 1343 (199M/1119F/4NB) 2. NA 3. 18-88 (50.06±13.15) 4. 15% M 5. Education, employment status, country of birth 6. a. Masc/fem   b. Age, education, employment status, country of birth | 1. BSRI 2. Self-reported adverse effects of pain medication 3. Multi-variate two-part regression model / pain onset & management, location, employment, disability, education, age, health, substance use | 1. Adg participants had ↑ severe adverse effects; F had sig ↑ severe adverse effects compared to M 2. NR 3. GI, GR differences were assoc w/ number of severe adverse effects |
| 1. Po Yee Lo I, et al. (2019);  *Arch Sex Behav;*  United Kingdom; Oxford; USA; Louisiana; Texas; Arlington; Victoria; Abbotsford; Community; Excellent | 1. Examine effects of different types of GR on depr 2. Cross-sectional 3. NA 4. a. Female, aged 18–35yrs 5. NR 6. Speak & read Chinese, identifies as lesbian 7. Citizen of Hong Kong 8. a. NR 9. NR 10. NR 11. NR | 1. 438 (0M/438F) 2. NA 3. 18–35 (24.67±4.6) 4. 0% M 5. Occupation, education, relationship status, religion 6. a. Masc/fem   b. NR | 1. BSRI, 2. HADS 3. ANOVA, structural equation model /age | 1. Strong masc & adg traits sig assoc w/ ↓ depr; Strong fem traits were sig assoc w/ ↑ depr 2. NR 3. ↑ masc & fem traits can promote psychological health |
| 1. Short S, et al. (2023);  *Midwifery;*  United Kingdom; Community; Good | 1. Explore link b/w masc & depr in fathers in PP period 2. Cross-sectional 3. NA 4. a. 1st- or 2nd-time father in UK 5. NR 6. NR 7. Youngest child <1 yr 8. a. NR 9. NR 10. NR 11. NR | 1. 118 (118M/0F) 2. NA 3. 1st-time fathers (33.71±6.01)   2nd-time fathers (35.56±4.64)   1. 100% M 2. Sexual orientation, race (93% Caucasian, 5% Asian & Mixed Asian, 2% Black), occupation, relationship status, residence, parental leave 3. a. Masc norms   b. Age, parental leave status | 1. CMNI 2. EPDS, MSPSS 3. Partial correlations/age | 1. Post-natal depr had pos correlation w/Self-Reliance & Primacy of Work 2. Parental leave status had NS effect on depr & perceived social support 3. Conformity to masc norms (Self-Reliance, Primacy of Work) was related to PP depr |
| 1. Snyder PJ, et al. (2016); *New Engl J Med;* USA; Pennsylvania; Philadelphia; Hospital; Good | 1. Determine the impact of T tx in men w/ low T levels 2. Double-blind placebo controlled 3. Assessment at 3mos, 6mos, 9mos, 12mos 4. a. Age ≥65yrs 5. Serum T <275ng/dL 6. NR 7. ↓ libido, difficulty w/ walking or stairs, ↓ VT 8. a. NR 9. ↑ risk of prostate cancer, CVD; Hx of prostate cancer, hypogonadism, depr; meds that alter T levels 10. NR 11. Non-ambulatory or physically disabled | 1. 790 (790M/0F) 2. 12mos=10.8% 3. ≥65yrs 4. 100% M 5. Race 6. a. TT & free T b. Race, age | 1. TT (ng/dL), free T (ng/dL) 2. PDQ, FACIT-Fatigue 3. Random effects models / baseline TT, age, location, med Rx | 1. Tx group had ↑ PDQ scores & ↓ in depr sx compared to placebo 2. No sig interactions of T tx w/ age or race 3. ↑ of T levels in men ≥65yrs to the low-normal range for men 19-40yrs had sig effects on sexual function, mood |
| 1. Vafaei A, et al. (2016);  *PLOS One;* Canada; Ontario, Kingston; Quebec, Montreal Brazil; Rio de Grande Norto; Community; Excellent | 1. Assess assoc between GR & depr in older adults 2. Cross-sectional 3. NA 4. a. Aged 65–74yrs 5. NR 6. NR 7. Patients of family medicine teams in Kingston & Saint-Hyacinthe (Canada), Tirana (Albania), Manizales (Colombia) & Natal (Brazil), 8. a. NR 9. NR 10. NR 11. NR | 1. 1967 (942M/1025F) 2. NA 3. 65–74   M (69.1.1±2.9) F (69.1±2.8)   1. 48% M 2. Education, marital Status, income 3. a. Masc/fem   b. Binary sex, education, marital status, income, SRH | 1. BSRI 2. CES-D 3. Bivariate analyses / binary sex; Multi-linear analyses / binary sex, education, marital status, income, SRH, chronic conditions | 1. M & F w/ masc traits had ↑ rates of depr; M & F w/ adg traits had ↓ rates of depr 2. Marital status & income had indep effects on depr 3. Adg older adults reported the fewest depr Sx |
| 1. Yang X, et al. (2018);  *J Affective Disorders;* China; Hong Kong; Shenzhen; Community; Good | 1. Examine link b/w masc role discrepancy & MH 2. Cross-sectional 3. NA 4. a. Male, aged 18-60yrs 5. NR 6. Chinese M, Chinese speaking, reside in Hong Kong 7. NR 8. a. Aged ≥60yrs 9. NR 10. NR 11. NR | 1. 2000 (2000M/0F) 2. NA 3. 18–60 4. 100% M 5. Education, marital status 6. a. Masc   b. Age, education, marital status | 1. MGRDSS 2. CESD-10, SCS 3. Pearson correlation / Age, relationship status, education | 1. MRD had pos assoc w/ depr & social anx 2. Age had sig assoc w/ stress & social anx 3. MRD had sig impact on depr |
| 1. Zeldow PB, et al. (1987); *J Pers Assess;* USA;  Illinois; Chicago; Community; Fair | 1. Examine relationship b/w masc & fem with adjustment, interpersonal functioning in medical school 2. Longitudinal 3. Follow up at 21mos 4. a. NR 5. NR 6. NR 7. 1st year medical students 8. a. NR 9. NR 10. NR 11. NR | 1. 115 (67M/32F) 2. 21mos=18% 3. 25.4 4. 58% M 5. NR 6. a. Masc/fem   b. NR | 1. PAQ 2. BDI 3. Correlation test / NR | 1. Masc and fem had NS assoc w/ depr 2. NR 3. Adg had ↑ risk of depr sx |

*Note:* In this table we have used the terms ‘sex’, ‘male’ & ‘female’ when researchers reported results based on biological attributes of their participants, regardless of the term used in the original text. The use of the term ‘primary predictor’ does not imply causality but identifies the predictor as a main factor possibly associated with an outcome.

*Abbreviations:* **Adg**, androgynous; **ANOVA**, analysis of variance; **Anx**, anxiety; **BDI**, Beck Depression Inventory; **BMI**, body mass index; **BP**, blood pressure; **BSRI-SF**, Bem Sex Role Inventory-Short Form; **BSRI**, Bem Sex Role Inventory; **CCI**, Charlson Comorbidity Index; **CES-D**, Center for Epidemiological Studies-Depression Scale; **CESD-10**, Center for Epidemiological Studies-Depression Scale, Short Form; **cFT**, calculated free testosterone; **CHD**, coronary heart disease; **CI**, confidence interval; **CMNI**, Conformity to Masculine Norms Inventory; **CP**, chronic pain; **CVD**, cardiovascular disease; **DASS-21**, Depression, Anxiety, and Stress Scale-21; **Depr**, depression; **DERS-SF**, Difficulties in Emotion Regulation Scale-Short Form; **Dx**, diagnosis; **Dysreg**, dysregulation; **ED**, erectile dysfunction; **EPDS**, Edinburgh Postnatal Depression Scale; **F**, females; **FACIT-Fatigue**, Functional Assessment of Chronic Illness Therapy-Fatigue Scale; **Fem**, femininity; **GE-PAQ**, German Extended Personal Attributes Questionnaire; **GI**, gender identity; **GR**, gender role; **GRO**, gender role orientation; **GSMD**, Gotland Scale for Male Depression; **HADS**, Hospital Anxiety and Depression Scale; **HR**, hazard ratio; **Hx**, history; **IIEF-EF**, International Index of Erectile Function-Erectile Function; **IIEF-OF**, International Index of Erectile Function-Orgasmic Function; **IIEF-SD**, International Index of Erectile Function-Sexual Desire; **IIEF**, International Index of Erectile Function; **Inc**, including; **Indep**, independent; **IR**, insulin resistance; **M**, males; **Masc**, masculinity; **MBI**, Maslach Burnout Inventory; **MD**, muscle dysmorphia; **MDDI**, Muscle Dysmorphic Disorder Inventory; **MetS**, Metabolic Syndrome; **MGRDSS**, Masculine Gender Role Discrepancy Stress Scale; **MH**, mental health; **MI**, myocardial infarction; **Mod**, moderate; **Mos**, months; **MR**, Mendelian randomization; **MRD**, masculine role discrepancy; **MSPSS**, Multidimensional Scale of Perceived Social Support; **NA**, not applicable; **NB**, non-binary; **Neg**, Negative; **NR**, not reported; **NS**, non-significant; **PAQ**, Personal Attributes Questionnaire; **PCOS**, polycystic ovary syndrome; **PDQ**, Psychosexual Daily Questionnaire; **PGS**, polygenic score; **Pos**, Positive; **PP**, post-partum; **PTSD-CC**, Post-Traumatic Stress Disorder-Civilian Checklist; **Ref**, reference; **Reg**, regulation; **SCS**, Self-Consciousness Scale; **SES**, socioeconomic status; **SHBG**, sex hormone-binding globulin; **SI**, suicidal ideation; **Sig**, significant; **SRH**, self-reported health; **Sx**, symptoms; **T**, testosterone; **TD**, testosterone deficiency; **TT**, total testosterone; **UD**, undifferentiated; **VT**, vitality; **W/o**, without; **WHO-5**, World Health Organization-5 Well-Being Index; **Yrs**, years; **↑**, increased; **↓**, decreased
